# Supplementary material
Source: PubMed Central journal article supplement (PMC6134255)
Supplement: jcsm.14.9.1539s1.pdf [file jcsm.14.9.1539s1.pdf]

Patient characteristics by group (PAP with and without supplementary O<sub>2</sub>)

**Table S1. Patient's characteristics by O<sub>2</sub> supplementation to PAP therapy.**

|                                         | <b>PAP alone<br/>(n=125)</b> | <b>PAP + O<sub>2</sub><br/>(n=100)</b> | <b>P value</b> |
|-----------------------------------------|------------------------------|----------------------------------------|----------------|
| Age (years)                             | 57 (44-63)                   | 67 (62-73)                             | <0.001         |
| Gender, male (%)                        | 78 (62 %)                    | 31 (31%)                               | 0.001          |
| BMI (kg/m <sup>2</sup> )                | 45 (40-50)                   | 41 (38-49)                             | 0.1            |
| <b>Smoking status</b>                   |                              |                                        |                |
| Current smokers, <i>n</i> (%)           | 24 (19%)                     | 13 (13%)                               | 0.06           |
| <b>Comorbidities</b>                    |                              |                                        |                |
| Diabetes mellitus, <i>n</i> (%)         | 30 (24%)                     | 44 (44%)                               | 0.03           |
| Hypertension, <i>n</i> (%)              | 63 (50%)                     | 75 (75%)                               | 0.007          |
| Dyslipidaemia, <i>n</i> (%)             | 50 (40%)                     | 27 (27%)                               | 0.13           |
| Ischemic heart disease, <i>n</i> (%)    | 12 (10%)                     | 14 (14%)                               | 0.67           |
| Atrial Fibrillation, <i>n</i> (%)       | 2 (1.6%)                     | 15 (15%)                               | 0.006          |
| Compensated heart failure, <i>n</i> (%) | 7 (6%)                       | 24 (24%)                               | 0.005          |
| Stroke, <i>n</i> (%)                    | 0                            | 11 (11%)                               | 0.005          |
| Hypothyroidism                          | 19 (15%)                     | 16 (16%)                               | 0.5            |
| <b>ABGs</b>                             |                              |                                        |                |
| pH                                      | 7.39 ± 0.03                  | 7.39 ± 0.04                            | 0.45           |
| PaCO <sub>2</sub> (mmHg)                | 47 (46-49)                   | 53 (51-59)                             | <0.001         |
| PaO <sub>2</sub> (mmHg)                 | 68.8 ± 9.9                   | 59.6 ± 10.9                            | <0.001         |
| HCO <sub>3</sub> <sup>-</sup> (mmol/L)  | 28.7 ± 2.5                   | 33.2 ± 4.3                             | <0.001         |
| <b>Diagnostic PSG</b>                   |                              |                                        |                |
| AHI                                     | 66 (37-89)                   | 47 (31-77)                             | 0.04           |
| REM AHI                                 | 71.7 ± 27.9                  | 65.5 ± 24.9                            | 0.24           |
| 4% ODI                                  | 72.9 ± 31.3                  | 65.4 ± 26.0                            | 0.16           |
| Mean SpO <sub>2</sub> (%)               | 88 (84-90)                   | 85 (80-87)                             | <0.001         |
| Minimum SpO <sub>2</sub> (%)            | 66.8 ± 9.4                   | 63.5 ± 10.5                            | 0.06           |
| TST90 (min)                             | 149 (78-242)                 | 151 (121-241)                          | 0.3            |
| PtcCO <sub>2</sub> awake, mmHg          | 47 (46-49)                   | 54 (51-62)                             | <0.001         |
| Mean PtcCO <sub>2</sub> asleep, mmHg    | 60.3 ± 5.9                   | 72.6 ± 8.3                             | <0.001         |

Data are presented as mean values ± SD or median (25th-75th percentile), unless otherwise indicated.

BMI = Body mass index, ABGs = Arterial blood gases, PSG = Polysomnography, AHI = Apnea-hypopnea index, ODI = oxygen desaturation index, TST90 = total sleep time spent with SpO<sub>2</sub> <90%, PtcCO<sub>2</sub> = Transcutaneous CO<sub>2</sub>.

*Analysis in the subgroup of patients that never smoked*

**Table S2. Comparison of arterial blood gases and questionnaire scores at baseline and at the end of the follow-up period for never smokers (n=142).**

|                                    | Baseline         | End of follow up period | Difference         | P value |
|------------------------------------|------------------|-------------------------|--------------------|---------|
| <b>PaCO<sub>2</sub></b>            | 50.3 (47.2-56.5) | 43.0 (39.2-45.0)        | -8.8 (-15.2, -5.5) | <0.001  |
| <b>PaO<sub>2</sub></b>             | 61.5 ±9.1        | 73.2 ±10.1              | 11.7 ± 12.1        | <0.001  |
| <b>HCO<sub>3</sub><sup>-</sup></b> | 32.2 ± 4.4       | 27.8 ± 3.1              | -4.4 ± 5.0         | <0.001  |
| <b>ESS</b>                         | 14 (11-16)       | 7 (4-9)                 | -7 (-9, -4)        | <0.001  |
| <b>BDI</b>                         | 16.6 ± 7.1       | 9.8 ± 4.9               | -6.8 ± 5.3         | <0.001  |
| <b>SF-36</b>                       | 73 (67-76)       | 82 (78-86)              | 9 (7-12)           | <0.001  |

ESS = Epworth sleepiness scale, BDI= Beck depression inventory, SF-36 = Short form-36.

*Effect of PAP therapy in Arterial blood gases and questionnaires scores in the 3 OHS groups*

In all three OHS groups separately, the comparison of pretreatment with the last posttreatment measurements demonstrated significant improvements in median PaCO<sub>2</sub> values [mild: 47 (46-49) mmHg vs 41.6 (39-44) mmHg, p < 0.001; moderate: 53 (51-53) mmHg vs 43.4 (42.5-45.5) mmHg, p < 0.001; severe: 61 (58-67) mmHg vs 44 (41-46) mmHg, p < 0.001], mean PaO<sub>2</sub> values (mild: 67.6 ± 7.3 mmHg vs 74.7 ± 7.9 mmHg, p =0.001; moderate: 61.3 ± 4.7 mmHg vs 71.6 ± 10.7 mmHg, p=0.03; severe: 56.3 ± 9.5 mmHg vs 69.9 ± 10.6 mmHg, p=0.001) and mean HCO<sub>3</sub><sup>-</sup> values (mild: 28.9 ± 1.5 mmHg vs 27.2 ± 3.4 mmHg, p=0.007; moderate: 31.3 ± 3.6 mmHg vs 27.4 ± 3.2 mmHg, p=0.001; severe: 36.4 ± 4.5 mmHg vs 28.3 ± 3.1 mmHg, p<0.001). PaCO<sub>2</sub>, PaO<sub>2</sub> and HCO<sub>3</sub><sup>-</sup>

measured after follow up were not significantly different between the 3 groups ( $p=0.075$ ,  $p=0.27$  and  $0.57$ , respectively).

In mild OHS, the ESS changed from 14 (10-17) at baseline to 6 (4-8) after follow up ( $p < 0.001$ ), the BDI from  $14.3 \pm 7$  to  $7.9 \pm 4.9$  ( $p < 0.001$ ) and the SF-36 from 76 (71-81) to 84 (81-89) ( $p < 0.001$ ). In moderate OHS, the ESS changed from 14 (12-16) at baseline to 7 (5-9) after follow up ( $p < 0.001$ ), the BDI from  $17.4 \pm 7.5$  to  $9.8 \pm 5.1$  ( $p < 0.001$ ) and the SF-36 from 71 (60-76) to 84 (81-89) ( $p < 0.001$ ). In severe OHS, the ESS changed from 13 (10-16) at baseline to 7 (3-9) after follow up ( $p < 0.001$ ), the BDI from  $16.3 \pm 8.1$  to  $9.6 \pm 4.9$  ( $p < 0.001$ ) and the SF-36 from 71 (62-75) to 79 (75-87) ( $p < 0.001$ ).

#### *Correlations (Table S3 and S4)*

Change in  $\text{PaCO}_2$  was correlated with hours/day PAP use ( $r=-0.66$ ,  $p < 0.001$ ), baseline  $\text{PaCO}_2$  ( $r=-0.7$ ,  $p < 0.001$ ),  $\text{PaO}_2$  ( $r=0.45$ ,  $p < 0.001$ ),  $\text{HCO}_3^-$  ( $r=-0.45$ ,  $p < 0.001$ ),  $\text{PtcCO}_2$  asleep ( $r=-0.55$ ,  $p < 0.001$ ),  $\text{PtcCO}_2$  awake ( $r=-0.67$ ,  $p < 0.001$ ), moderate to severe OHS ( $r=-0.55$ ,  $p < 0.001$ ) and type of positive airway pressure therapy (Bi-level PAP) ( $r=-0.29$ ,  $p=0.014$ ). The use of nocturnal oxygen and total duration of therapy had no impact on the change in  $\text{PaCO}_2$ . In stepwise multiple linear regression models, the magnitude of change in  $\text{PaCO}_2$  was still associated only with PAP use [ $\beta = -1.5$  (95% CI, -2.5, -0.5);  $p=0.007$ ] and baseline  $\text{PaCO}_2$  [ $\beta = -0.87$  (95% CI, -1.2, -0.5);  $p < 0.001$ ] after controlling for the potential confounders that were found to be significant.

The change in  $\text{PaO}_2$  was related to hours of PAP use ( $r=0.44$ ,  $p < 0.001$ ), baseline  $\text{PaCO}_2$  ( $r=0.28$ ,  $p=0.02$ ) and baseline  $\text{PaO}_2$  ( $r=-0.6$ ,  $p < 0.001$ ) and after multiple regression only with baseline  $\text{PaO}_2$  [ $\beta = -0.89$  (95% CI -1.2, -0.57);  $p < 0.001$ ]. Change in  $\text{HCO}_3^-$  was

correlated with hours of PAP use ( $r=-0.37$ ,  $p=0.003$ ), baseline PaCO<sub>2</sub> ( $r=-0.52$ ,  $p<0.001$ ), baseline PaO<sub>2</sub> ( $r=0.4$ ,  $p=0.001$ ), baseline HCO<sub>3</sub><sup>-</sup> ( $r=-0.59$ ,  $p<0.001$ ), overnight mean SaO<sub>2</sub> ( $r=0.3$ ,  $p=0.015$ ), PtcCO<sub>2</sub> asleep ( $r=-0.42$ ,  $p=0.011$ ) and PtcCO<sub>2</sub> awake ( $r=-0.5$ ,  $p=0.002$ ) and moderate to severe OHS group ( $r=-0.4$ ,  $p=0.001$ ). In stepwise multiple linear regression models, the magnitude of HCO<sub>3</sub><sup>-</sup> change was still associated only with baseline HCO<sub>3</sub><sup>-</sup> [ $\beta= -0.77$ , (95% CI -1.1, -0.5);  $p<0.001$ ].

Change in ESS was correlated with hours of PAP use ( $r=-0.2$ ,  $p=0.03$ ) and baseline ESS ( $r=-0.8$ ,  $p<0.001$ ), but only with baseline ESS after multiple regression analysis [ $\beta=-0.78$ , (95%CI -0.89, -0.67);  $p<0.001$ ]. Change in BDI was associated with female gender ( $r=-0.23$ ,  $p=0.01$ ), age ( $r=-0.19$ ,  $p=0.04$ ), baseline BDI ( $r=-0.71$ ,  $p<0.001$ ), baseline SF-36 ( $r=0.38$ ,  $p<0.001$ ), presence of heart failure ( $r=-0.24$ ,  $p=0.009$ ), PtcCO<sub>2</sub> asleep ( $r=-0.29$ ,  $p=0.023$ ) and PtcCO<sub>2</sub> awake ( $r=-0.37$ ,  $p=0.003$ ) and type of positive airway pressure (Bi-level PAP) ( $r=-0.28$ ,  $p=0.002$ ). In stepwise multiple linear regression models, the magnitude of change in BDI was still associated with baseline BDI [ $\beta=-0.68$ , (95% CI -0.8, -0.6);  $p<0.001$ ], baseline SF-36 [ $\beta=-0.16$ , (95% CI -0.25, -0.01);  $p=0.004$ ], and PtcCO<sub>2</sub> awake [ $\beta=-0.097$ , (95% CI -0.26, -0.03);  $p=0.041$ ].

Change in SF-36 was correlated with hours of PAP use ( $r=0.39$ ,  $p<0.001$ ), age ( $r=0.24$ ,  $p=0.008$ ), baseline PaCO<sub>2</sub> ( $r=0.2$ ,  $p=0.03$ ), baseline PaO<sub>2</sub> ( $r=-0.3$ ,  $p=0.001$ ), nighttime SpO<sub>2</sub>\_mean ( $r=-0.22$ ,  $p=0.013$ ), baseline SF-36 ( $r=-0.53$ ,  $p<0.001$ ), PtcCO<sub>2</sub> awake ( $r=0.27$ ,  $p=0.033$ ), smoking ( $r=-0.19$ ,  $p=0.04$ ), diabetes ( $r=0.2$ ,  $p=0.021$ ), hypertension ( $r=0.19$ ,  $p=0.03$ ), CHD ( $r=0.19$ ,  $p=0.03$ ), heart failure ( $r=0.21$ ,  $p=0.019$ ) and moderate to severe OHS ( $r=0.2$ ,  $p=0.03$ ). In stepwise multiple linear regression models,

the magnitude of change in SF-36 was still associated with PAP use [ $\beta=0.8$ ; (95% CI 0.12, 1.45);  $p=0.007$ ] and baseline SF-36 [ $\beta=-0.27$ , (95% CI -0.45, -0.16);  $p<0.001$ ].

**Table S3.** Correlation of parameters with change in arterial blood gases.

| Parameters                                 | Change in PaCO <sub>2</sub> |         | Change in PaO <sub>2</sub> |         | Change in HCO <sub>3</sub> <sup>-</sup> |         |
|--------------------------------------------|-----------------------------|---------|----------------------------|---------|-----------------------------------------|---------|
|                                            | r Value                     | P Value | r Value                    | P Value | r Value                                 | P Value |
| <b>Age</b>                                 | -0.12                       | 0.35    | -0.02                      | 0.87    | -0.14                                   | 0.27    |
| <b>Gender, male</b>                        | -0.062                      | 0.62    | 0.07                       | 0.60    | -0.19                                   | 0.41    |
| <b>BMI</b>                                 | -0.1                        | 0.44    | 0.10                       | 0.45    | -0.12                                   | 0.34    |
| <b>Smoking</b>                             | 0.1                         | 0.40    | -0.21                      | 0.09    | 0.14                                    | 0.27    |
| <b>Diabetes mellitus</b>                   | -0.07                       | 0.56    | 0.06                       | 0.63    | -0.11                                   | 0.40    |
| <b>Hypertension</b>                        | 0.04                        | 0.78    | 0.005                      | 0.97    | 0.08                                    | 0.55    |
| <b>Ischemic heart disease</b>              | -0.11                       | 0.37    | 0.09                       | 0.46    | -0.05                                   | 0.68    |
| <b>Atrial Fibrillation</b>                 | -0.04                       | 0.74    | -0.08                      | 0.51    | -0.09                                   | 0.48    |
| <b>Compensated heart failure</b>           | -0.14                       | 0.28    | -0.002                     | 0.99    | -0.12                                   | 0.37    |
| <b>Stroke</b>                              | -0.001                      | 0.98    | -0.04                      | 0.74    | -0.19                                   | 0.15    |
| <b>PaCO<sub>2</sub> (mmHg)</b>             | -0.7                        | <0.001  | 0.28                       | 0.02    | -0.52                                   | <0.001  |
| <b>PaO<sub>2</sub> (mmHg)</b>              | 0.45                        | <0.001  | -0.6                       | <0.001  | 0.40                                    | 0.001   |
| <b>HCO<sub>3</sub><sup>-</sup>(mmol/L)</b> | -0.45                       | <0.001  | 0.24                       | 0.06    | -0.59                                   | <0.001  |
| <b>AHI</b>                                 | 0.11                        | 0.39    | 0.05                       | 0.70    | 0.05                                    | 0.70    |
| <b>4% ODI</b>                              | 0.08                        | 0.55    | -0.03                      | 0.80    | -0.012                                  | 0.93    |
| <b>Mean SpO<sub>2</sub> (%)</b>            | 0.19                        | 0.13    | -0.1                       | 0.41    | 0.31                                    | 0.015   |
| <b>Minimum SpO<sub>2</sub> (%)</b>         | 0.06                        | 0.63    | -0.17                      | 0.17    | 0.19                                    | 0.13    |
| <b>TST90 (min)</b>                         | -0.14                       | 0.33    | -0.003                     | 0.98    | -0.13                                   | 0.39    |
| <b>PtcCO<sub>2</sub> awake, mmHg</b>       | -0.67                       | <0.001  | 0.27                       | 0.11    | -0.50                                   | 0.002   |
| <b>Mean PtcCO<sub>2</sub> asleep, mmHg</b> | -0.55                       | <0.001  | 0.26                       | 0.12    | -0.42                                   | 0.011   |
| <b>PAP, hours/night</b>                    | -0.66                       | <0.001  | 0.44                       | <0.001  | -0.37                                   | 0.003   |

BMI = Body mass index, AHI = Apnea-hypopnea index, ODI = oxygen desaturation index, TST90 = total sleep time spent with SpO<sub>2</sub> <90%, PtcCO<sub>2</sub> = Transcutaneous CO<sub>2</sub>.

**Table S4.** Correlation of parameters with change in Questionnaire scores.

| Parameters                             | Change in ESS |         | Change in BDI |         | Change in SF-36 |         |
|----------------------------------------|---------------|---------|---------------|---------|-----------------|---------|
|                                        | r Value       | P Value | r Value       | P Value | r Value         | P Value |
| Age                                    | 0.05          | 0.58    | -0.19         | 0.04    | 0.24            | 0.008   |
| Gender, male                           | 0.05          | 0.61    | -0.23         | 0.01    | 0.13            | 0.14    |
| BMI                                    | -0.03         | 0.78    | -0.09         | 0.29    | -0.07           | 0.43    |
| Smoking                                | 0.09          | 0.36    | 0.07          | 0.42    | -0.19           | 0.04    |
| Diabetes mellitus                      | -0.04         | 0.67    | -0.16         | 0.07    | 0.21            | 0.021   |
| Hypertension                           | 0.05          | 0.62    | -0.13         | 0.17    | 0.19            | 0.03    |
| Ischemic heart disease                 | 0.02          | 0.86    | -0.16         | 0.08    | 0.19            | 0.03    |
| Atrial Fibrillation                    | 0.08          | 0.39    | -0.08         | 0.41    | -0.09           | 0.48    |
| Compensated heart failure              | 0.05          | 0.59    | -0.24         | 0.009   | 0.21            | 0.019   |
| Stroke                                 | 0.13          | 0.17    | -0.06         | 0.53    | 0.03            | 0.79    |
| PaCO <sub>2</sub> (mmHg)               | 0.12          | 0.19    | -0.14         | 0.14    | 0.20            | 0.03    |
| PaO <sub>2</sub> (mmHg)                | 0.07          | 0.49    | 0.12          | 0.22    | -0.30           | 0.001   |
| HCO <sub>3</sub> <sup>-</sup> (mmol/L) | 0.03          | 0.80    | -0.09         | 0.32    | 0.11            | 0.23    |
| AHI                                    | -0.16         | 0.09    | 0.05          | 0.56    | -0.12           | 0.21    |
| 4% ODI                                 | -0.09         | 0.32    | 0.07          | 0.42    | -0.13           | 0.15    |
| Mean SpO <sub>2</sub> (%)              | 0.12          | 0.21    | 0.06          | 0.50    | -0.22           | 0.013   |
| Minimum SpO <sub>2</sub> (%)           | 0.15          | 0.12    | 0.04          | 0.69    | -0.11           | 0.24    |
| TST90 (min)                            | -0.05         | 0.61    | -0.02         | 0.83    | -0.10           | 0.34    |
| PtcCO <sub>2</sub> awake, mmHg         | 0.005         | 0.97    | -0.37         | 0.003   | 0.27            | 0.033   |
| Mean PtcCO <sub>2</sub> asleep, mmHg   | 0.03          | 0.83    | -0.29         | 0.023   | 0.18            | 0.17    |
| PAP, hours/night                       | -0.2          | 0.03    | -0.12         | 0.18    | 0.39            | <0.001  |
| ESS, baseline                          | -0.82         | <0.001  | -0.08         | 0.37    | 0.07            | 0.47    |
| BDI, baseline                          | 0.02          | 0.80    | -0.71         | <0.001  | 0.15            | 0.09    |
| SF-36, baseline                        | -0.07         | 0.49    | 0.38          | <0.001  | -0.53           | <0.001  |

BMI = Body mass index, AHI = Apnea-hypopnea index, ODI = oxygen desaturation index, TST90 = total sleep time spent with SpO<sub>2</sub> <90%, PtcCO<sub>2</sub> = Transcutaneous CO<sub>2</sub>, ESS = Epworth sleepiness scale, BDI= Beck depression inventory, SF-36 = Short form-36.

*Subgroup analysis by hours of PAP use*

**Table S5: Comparison of baseline demographics, spirometric measurements and ABG analysis results between patients with PAP use  $\geq 6$  and  $< 6$  hours of PAP use per night.**

| Characteristics                        | <6 hours of PAP use<br>N=97 | $\geq 6$ hours of PAP use<br>N=128 | P-value |
|----------------------------------------|-----------------------------|------------------------------------|---------|
| Age (years)                            | 61 (48-69)                  | 64 (49-70)                         | 0.55    |
| Gender, male (%)                       | 51 (53%)                    | 57 (44%)                           | 0.34    |
| BMI (kg/m <sup>2</sup> )               | 44 (37-49)                  | 43 (39-50)                         | 0.34    |
| Neck circumference (cm)                | 45.1 $\pm$ 4.2              | 45.3 $\pm$ 4.2                     | 0.80    |
| Waist circumference (cm)               | 128 (122-141)               | 134 (124-147)                      | 0.09    |
| <b>Smoking status</b>                  |                             |                                    |         |
| Current smokers                        | 22 (23%)                    | 14 (11%)                           | 0.22    |
| <b>Comorbidities</b>                   |                             |                                    |         |
| Diabetes mellitus, <i>n</i> (%)        | 33 (34%)                    | 42 (33%)                           | 0.89    |
| Hypertension, <i>n</i> (%)             | 54 (55%)                    | 84 (66%)                           | 0.22    |
| Dyslipidaemia, <i>n</i> (%)            | 42 (44%)                    | 38 (30%)                           | 0.16    |
| Ischemic heart disease, <i>n</i> (%)   | 11 (11%)                    | 15 (12%)                           | 0.98    |
| Compensated heart failure              | 14 (15%)                    | 16 (12%)                           | 0.72    |
| Atrial Fibrillation                    | 7 (8%)                      | 9 (7%)                             | 0.94    |
| Stroke, <i>n</i> (%)                   | 4 (4.3%)                    | 7 (6%)                             | 0.64    |
| Hypothyroidism                         | 10 (11%)                    | 24 (19%)                           | 0.27    |
| <b>PFT</b>                             |                             |                                    |         |
| FEV <sub>1</sub> , % predicted         | 85.6 $\pm$ 13.3             | 81.4 $\pm$ 10.9                    | 0.33    |
| FVC, % predicted                       | 83.3 $\pm$ 10.4             | 85.6 $\pm$ 12.7                    | 0.69    |
| FEV <sub>1</sub> /FVC                  | 80 (79.9-86.4)              | 81 (76-83)                         | 0.45    |
| <b>ABG</b>                             |                             |                                    |         |
| pH                                     | 7.39 $\pm$ 0.04             | 7.39 $\pm$ 0.03                    | 0.95    |
| PaCO <sub>2</sub> (mmHg)               | 49 (46-53)                  | 51 (47-56)                         | 0.19    |
| PaO <sub>2</sub> (mmHg)                | 67.1 $\pm$ 12.9             | 62.6 $\pm$ 9.6                     | 0.05    |
| HCO <sub>3</sub> <sup>-</sup> (mmol/L) | 30.0 $\pm$ 3.2              | 31.3 $\pm$ 4.6                     | 0.09    |

Data are presented as mean values  $\pm$  SD or median (25th-75th percentile), unless otherwise indicated.

BMI = Body mass index, PFT = Pulmonary function test, FVC = Forced Vital Capacity, FEV<sub>1</sub> = Forced Expiratory Volume in One Second, ABG = Arterial blood gases.



**Table S6. Comparison of baseline PSG data and questionnaires scores between patients with PAP use  $\geq 6$  and  $< 6$  hours of PAP use per night.**

|                                 | <b>&lt;6 hours of PAP use</b> | <b><math>\geq 6</math> hours of PAP use</b> | <b>P-value</b> |
|---------------------------------|-------------------------------|---------------------------------------------|----------------|
|                                 | <b>N=97</b>                   | <b>N=128</b>                                |                |
| <b>Diagnostic PSG</b>           |                               |                                             |                |
| AHI                             | 58 (37-87)                    | 57 (35-85)                                  | 0.46           |
| AHI REM                         | 67 $\pm$ 25                   | 70 $\pm$ 28                                 | 0.59           |
| AI                              | 50 $\pm$ 17                   | 53 $\pm$ 23                                 | 0.43           |
| 4% ODI                          | 71 $\pm$ 27                   | 68 $\pm$ 31                                 | 0.62           |
| Mean SpO <sub>2</sub> (%)       | 87 (83-90)                    | 86 (80-89)                                  | 0.21           |
| Minimum SaO <sub>2</sub> (%)    | 66 $\pm$ 11.                  | 65 $\pm$ 9                                  | 0.38           |
| TST90 (min)                     | 143 (90-242)                  | 156 (119-241)                               | 0.17           |
| PtcCO <sub>2</sub> wake, mmHg   | 50 (48-52)                    | 53 (47-60)                                  | 0.15           |
| PtcCO <sub>2</sub> asleep, mmHg | 67.1 $\pm$ 9.1                | 67.9 $\pm$ 9.9                              | 0.96           |
| <b>After PAP titration</b>      |                               |                                             |                |
| AHI                             | 4 (3-4)                       | 4 (3-4)                                     | 0.43           |
| AI                              | 6.9 $\pm$ 2.3                 | 7.4 $\pm$ 2.5                               | 0.21           |
| 4% ODI                          | 4.6 $\pm$ 1.9                 | 4.9 $\pm$ 1.6                               | 0.32           |
| Mean SpO <sub>2</sub> (%)       | 95 (94-95)                    | 95 (94-95)                                  | 0.29           |
| Lowest SpO <sub>2</sub> (%)     | 89.1 $\pm$ 1.6                | 88.3 $\pm$ 2.3                              | 0.02           |
| TST90 (min)                     | 1.6 $\pm$ 2.1                 | 2.1 $\pm$ 2.5                               | 0.34           |
| <b>Questionnaires</b>           |                               |                                             |                |
| ESS                             | 12 (10-16)                    | 14 (11-16)                                  | 0.57           |
| BDI                             | 15.9 $\pm$ 6.9                | 15.1 $\pm$ 7.6                              | 0.59           |
| SF-36                           | 74 (67-78)                    | 75 (68-81)                                  | 0.50           |

Data are presented as mean values  $\pm$  SD or median (25th-75th percentile), unless otherwise indicated.

PSG = Polysomnography, AHI = Apnoea-hypopnea index, AI = Arousal index, ODI = oxygen desaturation index, TST90 = total sleep time spent with SpO<sub>2</sub> <90%, PtcCO<sub>2</sub> =

Transcutaneous CO<sub>2</sub>, PAP = Positive airway pressure, ESS = Epworth sleepiness scale, BDI= Beck depression inventory, SF-36 = Short form-36.

**Table S7. Comparisons of changes in arterial blood gases and questionnaire scores over the follow up according hours of PAP use per night in never smokers.**

|                                    | <b>&lt;6 hours of PAP use</b> | <b>≥6 hours of PAP use</b> | <b>P-value</b> |
|------------------------------------|-------------------------------|----------------------------|----------------|
| <b>All Patients</b>                |                               |                            |                |
|                                    | <b>(n=55)</b>                 | <b>(n=87)</b>              |                |
| <b>PaCO<sub>2</sub></b>            | -3.0 (-5.6, -2.5)             | -10.7 (-16.6, -8.2)        | <0.001         |
| <b>PaO<sub>2</sub></b>             | 4.9 ± 8.1                     | 14.4 ± 12.4                | 0.015          |
| <b>HCO<sub>3</sub><sup>-</sup></b> | -1.5 ± 2.2                    | -5.6 ± 5.4                 | 0.01           |
| <b>ESS</b>                         | -6 (-10, -3)                  | -7 (-9, -5)                | 0.51           |
| <b>BDI</b>                         | -6.5 ± 4.6                    | -7.0 ± 5.8                 | 0.73           |
| <b>SF-36</b>                       | 8 (3-10)                      | 11 (8-14)                  | 0.002          |

Data are presented as mean values ± SD or median (25th-75th percentile)

ESS = Epworth sleepiness scale, BDI= Beck depression inventory, SF-36 = Short form-36.

**Table S8. Comparisons of changes in arterial blood gases and questionnaire scores over the follow up according hours of PAP use per night.**

|                                    | <4 hours of PAP use | 4-5.9 hours of PAP use | 6-7 hours of PAP use              | >7 hours of PAP use                  | P-Value<br>Across all |
|------------------------------------|---------------------|------------------------|-----------------------------------|--------------------------------------|-----------------------|
|                                    | Group 1<br>(n=27)   | Group 2<br>(n=69)      | Group 3<br>(n=82)                 | Group 4<br>(n=47)                    |                       |
| <b>PaCO<sub>2</sub></b>            | -2.7 (-3.1, -2.1)   | -4.7 (-6.4, -2.7)      | -9.6 (-15.0, -7.4) <sup>#**</sup> | -13 (-17.9, -8.2) <sup>\$&amp;</sup> | <0.001                |
| <b>PaO<sub>2</sub></b>             | -14.1 ± 20.0        | 4.1 ± 9.3 <sup>*</sup> | 13.4 ± 13.2 <sup>#</sup>          | 13.6 ± 11.0 <sup>\$</sup>            | <0.001                |
| <b>HCO<sub>3</sub><sup>-</sup></b> | -0.5 ± 3.4          | -1.3 ± 2.2             | -5.6 ± 6.0 <sup>**</sup>          | -4.6 ± 6.1                           | 0.012                 |
| <b>ESS</b>                         | -6 (-11, -3)        | -5 (-9, -2)            | -6 (-9, -3)                       | -9 (-12, -6)                         | 0.15                  |
| <b>BDI</b>                         | -5.7 ± 3.3          | -6.3 ± 4.4             | -6.8 ± 5.9                        | -7.6 ± 7.1                           | 0.71                  |
| <b>SF-36</b>                       | 7 (5-8)             | 7.5 (4-11)             | 8 (7-11) <sup>#</sup>             | 11 (8-16) <sup>\$&amp;¥</sup>        | 0.001                 |

Data are presented as mean values ± SD or median (25th-75th percentile).

ESS = Epworth sleepiness scale, BDI= Beck depression inventory, SF-36 = Short form-36.

# P < 0.05 Group 3 vs 1 OHS; \*P < 0.05 Group 2 vs 1 OHS; \*\*P < 0.05 Group 3 vs 2, \$P < 0.05 Group 4 vs 1, & P < 0.05 Group 4 vs 2,

¥ Group 4 vs 3.
